# Supplementary material
Source: ML conference proceedings conference paper supplement (https://proceedings.neurips.cc/paper_files/paper/2023/hash/6492267465a7ac507be1f9fd1174e78d-Abstract.html)
Supplement: Supplementary file 1 [file 6492267465a7ac507be1f9fd1174e78d-Supplemental-Datasets_and_Benchmarks.pdf]

---

# Hypotheses Paradise: An Open and Strong Baseline for Speech Recognition with Large Language Models

---

Chen Chen<sup>1,†</sup> Yuchen Hu<sup>1,†</sup> Chao-Han Huck Yang<sup>2\*</sup> Sabato Macro Siniscalchi<sup>2,3</sup>  
Pin-Yu Chen<sup>4</sup> Eng Siong Chng<sup>1</sup>

<sup>1</sup>Nanyang Technological University, Singapore; <sup>2</sup>Georgia Institute of Technology, USA  
<sup>3</sup>Norwegian University of Science and Technology, Norway; <sup>4</sup>IBM Research AI, USA  
{chen1436, yuchen005}@e.ntu.edu.sg, huckiyang@gatech.edu

## Abstract

Advancements in deep neural networks have allowed automatic speech recognition (ASR) systems to attain human parity on several publicly available clean speech datasets. However, even state-of-the-art ASR systems experience performance degradation when confronted with adverse conditions, as a well-trained acoustic model is sensitive to variations in the speech domain, e.g., background noise. Intuitively, humans address this issue by relying on their linguistic knowledge: the meaning of ambiguous spoken terms is usually inferred from contextual cues thereby reducing the dependency on the auditory system. Inspired by this observation, we introduce the first open-source benchmark to utilize external large language models (LLMs) for ASR error correction, where N-best decoding hypotheses provide informative elements for true transcription prediction. This approach is a paradigm shift from the traditional language model rescoring strategy that can only select one candidate hypothesis as the output transcription. The proposed benchmark contains a novel dataset, “Hypotheses Paradise” (HP), encompassing more than 316,000 pairs of N-best hypotheses and corresponding accurate transcriptions across prevalent speech domains. Given this dataset, we examine three types of error correction techniques based on LLMs with varying amounts of labeled hypotheses-transcription pairs, which gains a significant word error rate (WER) reduction. Experimental evidence demonstrates the proposed technique achieves a breakthrough by surpassing the upper bound of traditional re-ranking based methods. More surprisingly, LLM with reasonable prompt and its generative capability can even correct those tokens that are missing in N-best list. We make our results publicly accessible for reproducible pipelines with released pre-trained models, thus providing a new paradigm for ASR error correction with LLMs.

## 1 Introduction

Automatic speech recognition (ASR) has become increasingly important in modern society, as it enables efficient and accurate transcription of spoken languages. This capability facilitates access to information and enhances communication across various domains, including education [7], health-care [51], and business [36]. Driven by the recent advances in deep learning, remarkable success has been achieved on several ASR tasks through end-to-end training techniques [27, 26, 9, 20, 29]. However, a major challenge of applying ASR in practical conditions lies in effectively handling variations in speech caused by different factors such as background noise [10], speaker accent [87], and speaking styles [83, 2]. These adverse factors are common and inevitable in speech signal, significantly affecting the accuracy of the recognition results [56].

---

\*Work done while the author was affiliated with Georgia Tech. Corresponding Author. †Equal contribution.

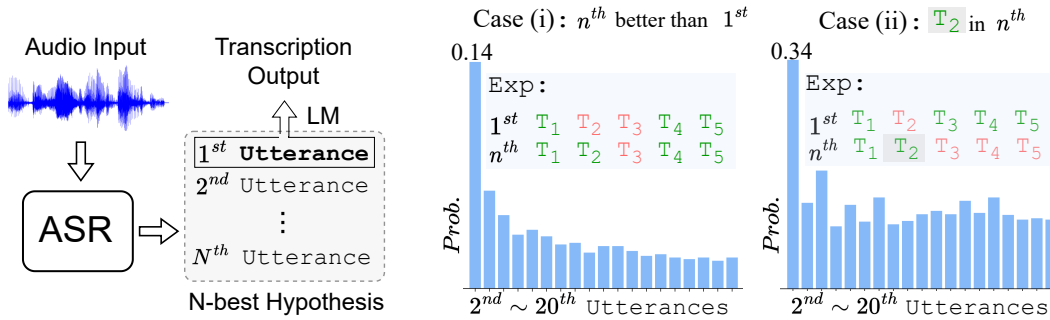

Figure 1: The left part shows the pipeline to generate the N-best hypotheses using a vanilla ASR engine with beam search decoding. The right part counts the probabilities of case (i) and case (ii) on the test set of LibriSpeech dataset. It indicates the discarded information in 2<sup>nd</sup> ~ 20<sup>th</sup> utterances. Green and red  $T_i$  in “Exp” respectively denote correct and wrong tokens compared with ground-truth.

Humans demonstrate remarkable robustness when faced with the above variations in acoustic environment, as the human recognition system does not only rely on acoustic cues – we usually speculate the ambiguous or distorted spoken terms based on speech context and our inherent linguistic knowledge. Similarly, current ASR system typically employs an independent language model (LM) for rescoring during the decoding process [85, 47, 44, 24]. As shown in Fig. 1, given N-best hypotheses generated by an ASR engine with beam search decoding, a trained language model (LM) can be used to re-score each utterance and select the one with the highest likelihood (referred to as the 1<sup>st</sup> utterance) as the output of the ASR; whereas, the other sentences (the 2<sup>nd</sup> – N<sup>th</sup> utterances) are discarded. However, it is widely believed [71] that the N-best list contains useful information [90, 37, 57], as each hypothesis is an independent textual representation of the input speech. Consequently, discarded sentences might also carry correct tokens for accurately predicting the true transcription. To validate this belief, we have conducted experiments on the LibriSpeech dataset [69], counting the probabilities of two scenarios observed during LM rescoring: (i) the discarded utterances contain a better candidate with lower word error rate (WER), and (ii) the other discarded hypotheses can provide the right answer for the wrong tokens in 1<sup>st</sup> utterance. The statistical results of 2<sup>nd</sup> ~ 20<sup>th</sup> utterances are shown in the left part of Fig. 1. Taking 2<sup>nd</sup> discarded utterance as example, it has a 14% probability of having a lower WER than the 1<sup>st</sup> utterance. Furthermore, given a wrong token in 1<sup>st</sup> utterance, there is a 34% probability of finding the correct token in the 2<sup>nd</sup> utterance.

To better mine the information in N-best hypotheses, we propose the first attempt on publicly available **ASR generative error correction benchmark** that directly predicts a true transcription, rather than selecting a candidate from the N-best list. To put forth this benchmark, we introduce a novel dataset named *Hypotheses Paradise (HP)*, which comprises various N-best hypotheses provided by state-of-the-art ASR systems and their paired true transcriptions. Considering real-life applications, HP dataset covers various challenging speech domains, including scenarios with background noise, specific contexts, and speaker accents. Furthermore, in terms of resources availability, we define three settings to mimic the deployment of ASR systems in real-world scenarios: (i) *Zero-shot Learning*. In this setting, only test set hypotheses are available for inference. This corresponds to applying a well-trained ASR model to new scenarios without any training data. (ii) *Few-shot Learning*. A few in-domain hypotheses with true transcription are available for training. This setting aims to address domain-specific ASR tasks with a few manual annotations. (iii) *Finetuning*. A sufficient training set is available to learn the mapping between hypotheses and transcription.

To exploit the three aforementioned scenarios, we present multiple error correction techniques using large language models (LLMs), which have shown the outperforming ability of language generation and reasoning in recent studies [5, 107, 49, 86]. For *zero-shot* and *few-shot* settings, we design an in-context learning method without any parameter tuning, which directly performs error correction based on task prompt and in-domain demonstration. In the *finetuning* scenario, we develop two sequence-to-sequence training solutions, H2T-*ft* and H2T-*LoRA*, which adapt pre-trained LLMs to specific transcription domains. Experimental results show that all learning strategies can be beneficial to reduce the WER in different resource settings, providing potential solutions for alleviating the

negative impact of speech variation. Additionally, with reasonable prompt design, LLMs can correct those specious tokens that are exclusive from N-best list. We will release the HP datasets, reproducible pipelines, and pre-trained models on Github <sup>2</sup> under MIT licence.

Our contribution can be summarized as follows:

- We propose the first benchmark to evaluate how LLMs can be utilized to enhance ASR results with N-best hypotheses, where a new dataset Hypotheses Paradise with more than 316K hypotheses-transcription pairs are collected from the various ASR corpus in most common speech domains.
- We develop three ASR error correction techniques based on LLMs in different resource settings to directly predict the true transcription from the N-best hypotheses. Experimental results in the *finetuning* setting show that our new approach can surpass the upper-bound of traditional re-ranking based methods.
- We present a new paradigm *generative error correction* for ASR: acoustic model generates informative elements in hypotheses list, and then LLMs predict accurate transcription using linguistic knowledge and context information.

## 2 Related Work

### 2.1 ASR Rescoring and Error Correction

In order to improve the linguistic acceptability of ASR results, LM rescoring has been widely employed and achieved stable performance gain for ASR systems [80, 65, 4]. Typically, an external LM is trained separately and utilized to re-score the N-best list of hypotheses generated by ASR decoding with beam search. Various approaches for LM integration have been proposed, such as shallow fusion [15, 104, 47, 85], deliberation [100, 31, 41, 40, 94, 39], component fusion [78], and cold fusion [82]. Some authors have used pre-trained LM models to replace trainable LMs [88, 76], and the log-likelihood of each hypothesis is computed using unidirectional models, e.g., GPT-2, or pseudo-log-likelihood using bidirectional models like BERT [19] and RoBERTa [61]. In ASR, LMs are also widely used for the error correction task in different languages [99, 28], leveraging only the 1-best hypothesis generated by the ASR model [54, 64, 106, 21, 109, 79]. Furthermore, more recent works [63, 53, 52] utilize a candidates list after decoding for error correction. Though Grammatical Error Correction (GEC) has been actively explored [18, 96], ASR error correction is distinct with GER due to the arbitrariness of the spoken language [2], which requires the efforts from both speech and NLP communities [16].

### 2.2 Large Language Models

More recently, there has been a surge of interest in Transformer-based LLMs [86, 73, 77, 107] in both academia and industry. By learning from massive amounts of text data, LLMs can capture linguistic patterns and semantic relationships, which have led to impressive performance for a wide range of natural language processing (NLP) tasks [5, 68, 98].

**In-context Learning.** Given specific task descriptions or input-output pairs, LLMs show outstanding adaptability on downstream NLP tasks without any parameter tuning [66, 67]. Such a capability of task-specific inference is also known as in-context learning (ICL) [101], which utilize LLMs to generate text that is more coherent and relevant to the specific domain or task [45, 14, 50, 75, 8, 108].

**Low-rank Approximation based Neural Adapter.** Tuning all LLM parameters for a given downstream task is usually not feasible due to memory constraints. Many researchers sought to mitigate that problem by either adapting only a few parameters or leveraging external trainable modules for a new task [60, 32]. A pioneer work [1] showed that the learned over-parametrized models in fact reside on a low intrinsic dimension, consequently, a low-rank adaptation (LoRA) approach [38] was proposed to indirectly tune some dense layers by optimizing rank decomposition matrices of the dense layers. Due to its computational efficiency, LoRA adaptation has been rapidly adopted as a new paradigm for LLMs tuning, which was useful in various downstream tasks [105, 23, 43, 95].

---

<sup>2</sup><https://github.com/Hypotheses-Paradise/Hypo2Trans>

### 3 Hypothesis Generation and Dataset Creation

We introduce the generation process of the Hypotheses Paradise dataset in this section. The employed ASR system for N-best hypotheses generation is illustrated in 3.1, and then we introduce the selected speech domain in 3.2. Finally, we provide statistic information and generated HP in 3.2.

#### 3.1 ASR System

We employ two state-of-the-art ASR models, namely WavLM [13] and Whisper [72] for N-best hypotheses generation. Besides their remarkable performance and popularity, those models are representative in the deployment of an ASR because: (1) WavLM is a well-trained ASR model on LibriSpeech [69] but suffering from domain mismatch, and (2) Whisper is a universal ASR model but lacking domain specificity. More details about those two ASR models are described below:

**WavLM:** We utilize the ESPnet toolkit [97] along with the pre-trained model from HuggingFace to deploy our WavLM-based ASR system. The WavLM architecture consists of two blocks: the front-end, and the ASR model (433 million parameters in total). The front-end consists of 24 Transformer-based [91] encoder layers and is pre-trained using a combination of LibriLight [46] (60k hours of data), Gigaspeech [11] (10k hours of data), and VoxPopuli [93] (24k hours of data). Front-end features are fed into the ASR back-end for finetuning. The back-end consists of 12 Conformer-based [29] encoder layers, and 6 Transformer-based decoder layers. The finetuning process is performed on 960-hour LibriSpeech data. Additionally, the WavLM decoding recipe incorporates an external LM rescoring option, where the external LM adopts Transformer architecture with 16 encoder layers and is trained using the text of LibriSpeech 960 hours data and extra LM training data from the web.

**Whisper:** We employ the Whisper-LargeV2 model developed by OpenAI to generate hypotheses, without in-domain language model rescoring. The used configuration consists of an encoder-decoder Transformer architecture with 1,550 million parameters, which is trained on 680,000 hours of multilingual-weakly labeled speech data collected from the web.

Leveraging these two pre-trained ASR models, we have employed the beam search algorithm during decoding and generated N-best lists of sentence hypotheses for each input waveform. For both WavLM and Whisper, the default beam size was set to 60. After removing repeatable utterances, we select top-5 utterances with highest probabilities as N-best list, as they have carried sufficient elements to accurately predict transcription. Subsequent experiments confirm this belief by calculating the accurately upper-bound WER using 5-best hypotheses list. To build the HP dataset, we carry out this decoding strategy on multiple popular ASR datasets (please see Section 3.2) and generate paired data consisting of an 5-best hypotheses list and 1 ground-truth transcription. The pre-processing and generation code are also released for integrating new ASR corpus into HP. All the links of relevant resources are presented in Appendix.

#### 3.2 Selected Speech Corpora

For corpora selection, our goal is to cover common scenarios of ASR task, e.g., noisy background and speaker accent. Consequently, we collect and modify the following corpora with evident domain characteristics to compose the HP dataset.

**LibriSpeech** [69]: LibriSpeech is a public corpus of read speech from audiobooks, including 1,000 hours of speech data with diverse speakers, genders, and accents. For generating HP training data, we exclude some simple cases from its *train-960* split that show WER result of 0, resulting in 88,200 training utterances. We use the entire *test-clean* and *test-other* splits for HP test data generation.

**CHiME-4** [92]: CHiME-4 is a dataset for far-field speech recognition. It includes real and simulated noisy recordings in four noisy environments, *i.e.*, bus, cafe, pedestrian area, and street junction. We use its *train* (with 8,738 utterances) and *test-real* (with 1,320 utterances) splits to generate HP training and test data. The four different noises in *test-real* split are also evaluated separately in Table 3.

**WSJ** [70]: The Wall Street Journal (WSJ) is a widely-used benchmark for speech recognition. It includes read speech from speakers in a controlled environment, with a focus on business news and financial data. We use its *train-si284* split (with 37,514 utterances) to generate HP training set. The *dev93* (with 503 utterances) and *eval92* (with 333 utterances) are applied to build test sets.

Table 1: HP dataset statistics in terms of the number of hypotheses-transcription pairs and average utterance length in various domains.

| Source      | Domain Category  | Training Set        | # Pairs | Length | Test Set           | # Pairs | Length |
|-------------|------------------|---------------------|---------|--------|--------------------|---------|--------|
| LibriSpeech | Audiobooks       | <i>train-960</i>    | 88,200  | 33.7   | <i>test-clean</i>  | 2,620   | 20.1   |
|             |                  |                     |         |        | <i>test-other</i>  | 2,939   | 17.8   |
| CHiME4      | Noise            | <i>train</i>        | 8,738   | 17.0   | <i>test-real</i>   | 1,320   | 16.4   |
| WSJ         | Business news    | <i>train-si284</i>  | 37,514  | 17.5   | <i>dev93</i>       | 503     | 16.7   |
|             |                  |                     |         |        | <i>eval92</i>      | 333     | 17.3   |
| SwitchBoard | Telephone        | <i>train</i>        | 36,539  | 11.8   | <i>eval2000</i>    | 2,000   | 11.8   |
| CommonVoice | Accented English | <i>train-accent</i> | 49,758  | 10.5   | <i>test-accent</i> | 2,000   | 10.5   |
| Tedlium-3   | TED talk         | <i>train</i>        | 47,500  | 12.6   | <i>test</i>        | 2,500   | 12.6   |
| LRS2        | BBC audio        | <i>train</i>        | 42,940  | 7.6    | <i>test</i>        | 2,259   | 7.6    |
| ATIS        | Airline info.    | <i>train</i>        | 3,964   | 12.4   | <i>test</i>        | 809     | 11.3   |
| CORAAL      | Interview        | <i>train</i>        | 1,728   | 24.2   | <i>test</i>        | 100     | 24.0   |
| Total       |                  | <i>train</i>        | 316,881 | 18.1   | <i>test</i>        | 17,383  | 14.1   |

**SwitchBoard** [25]: The SwitchBoard corpus is a telephone speech dataset collected from conversations between pairs of speakers. It focuses on North American English and involves over 2.4k conversations from approximately 200 speakers. We randomly select 36,539 samples from its *train* split to generate HP training set, as well as 2,000 utterances from the *eval2000* split for HP test set.

**CommonVoice** [3]: CommonVoice 5.1 is a freely-available dataset for speech recognition. It contains speech recordings from diverse speakers in over 60 languages. To generate HP dataset, we randomly select 51,758 samples from its *train-en* split with accent labels, *i.e.*, African, Australian, Indian, and Singaporean, where training set contains 49,758 samples and test set contains 2,000 samples.

**Tedlium-3** [34]: Tedlium-3 is a dataset of speech recorded from TED Talks in multiple languages. It contains a diverse range of background noise, speaker accents, speech topics, etc. Considering its large size, we randomly select 50,000 samples from its *train* split for HP dataset generation, where training set contains 47,500 samples and test set contains 2,500 samples.

**LRS2** [17]: Lip Reading Sentences 2 (LRS2) is a large-scale publicly available labeled audio-visual dataset, consisting of 224 hours of video clips from BBC programs. We randomly select 42,940 samples from its *train* split as training set, and the remaining 2,259 samples are used for test set.

**ATIS** [33]: Airline Travel Information System (ATIS) is a dataset comprising spoken queries for air travel information, such as flight times, prices, and availability. It contains around 5,000 to 5,400 utterances, which are recorded from around 500 to 550 speakers.

**CORAAL** [48]: The Corpus of Regional African American Language (CORAAL) is the first public corpus of AAL data. It includes audio recordings along with the time-aligned orthographic transcription from over 150 sociolinguistic interviews. To generate HP dataset, we select 1,728 samples as training set and 100 samples as test set.

### 3.3 Hypotheses Paradise (HP) Dataset Statistics

After performing beam search decoding on the selected speech datasets introduced in Section 3.2, we collected more than 316K pairs of hypotheses list and transcription to form the HP dataset, including training and test sets. The statistics for the HP dataset are given in Table 1, which shows the number of pairs and average length in various domains and splits. We would release our generated datasets and kindly request more hypotheses-transcription pairs from the public <sup>3</sup>.

<sup>3</sup><https://github.com/Hypotheses-Paradise/HP-V0>

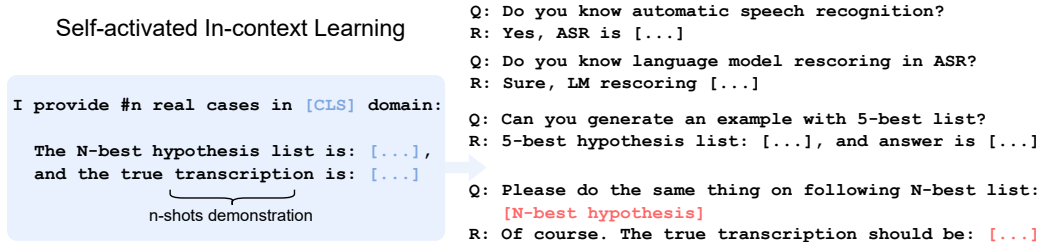

Figure 2: Self-activated in-context learning. The demonstration in blue box is drawn from the training set, which is optional for LLMs input.

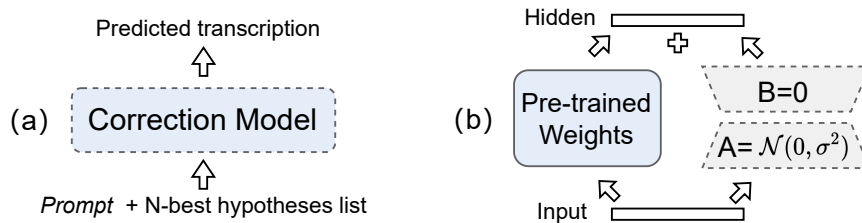

Figure 3: (a) Structure of H2T-*ft*. (b) Reparametrization in H2T-*LoRA*. Solid box denotes the module is fixed during tuning while dashed box stands for trainable. Blue color denotes the weights has been pre-trained on another dataset.

## 4 ASR Error Correction from Hypotheses to Transcription

We hereby introduce a hypotheses-to-transcription (H2T) training scheme utilizing the collected HP dataset to enhance ASR performance with LLM integration. With limited labeled data, in-context learning is employed to form task-specific prompts and in-domain demonstrations: Linguistic knowledge in LLM is exploited without parameter tuning. Furthermore, we present two trainable methods fine-tuning (*ft*) and H2T-*LoRA* to learn the hypotheses-to-transcription mapping when a sufficient amount of labeled data is available.

### 4.1 Self-activated In-context Learning

We present a “self-activated” in-context learning mechanism in Fig.2, where a multi-turn prompting is generated to activate consistent knowledge in LLMs. This mechanism can be applied for both *zero-shot* and *few-shot* settings, where *few-shot* setting requires some in-domain hypotheses-transcription pairs (blue box in Fig.2). Under this setup, an LLM first explains the task it is working on, then generates an example from its understanding, and finally produces the actual task output. In our experiments, we noticed that LLMs can mimic an N-best hypotheses list consisting of utterances with similar pronunciation, showing that LLMs have perceived acoustic information during pre-training.

In *few-shot* learning, we provide some in-domain training examples as a demonstration for LLM input, before an LLM performs on the target task. In this case, we can also insert the domain information into the demonstration, as shown in Fig.2. Furthermore, we explore the effect of this domain-hint prompting on zero-shot setting with relative experiments in 5.5.

### 4.2 Hypotheses-to-Transcription (H2T) Training

In addition to in-context learning, we introduce two parameter-tunable methods to learn hypotheses-to-transcription mapping in a sequence-to-sequence manner: H2T-*ft* and H2T-*LoRA*.

**H2T-*ft*** denotes fine-tuning all parameters of a neural model with labeled data of each HP domain. Specifically, we introduce a similar method with N-best T5, which utilizes other hypotheses to improve the 1-best hypothesis as shown in Fig. 3. To constrain the decoding space, we add a new item criterion  $\mathcal{L}_{ft} = \sum_{i=1}^N \alpha_i \log P(x^{(i)}|x, \theta)$ , where  $y^*$  denotes the ground-truth transcription,

Table 2: WER (%) results of H2T-*ft* and H2T-*LoRA* in *finetuning* setting. " $o_{nb}$ " and " $o_{cp}$ " respectively denote n-best oracle and compositional oracle that are defined in 5.2.

| Test Set          | Baseline | $LM_{rank}$ | H2T- <i>ft</i> |       | H2T- <i>LoRA</i>             |                               | Oracle   |          |
|-------------------|----------|-------------|----------------|-------|------------------------------|-------------------------------|----------|----------|
|                   |          |             | T5             | LLaMA | T5                           | LLaMA                         | $o_{nb}$ | $o_{cp}$ |
| WSJ               | 4.5      | 4.3         | 4.0            | 3.8   | 2.7 <sub>-40.0%</sub>        | <b>2.2</b> <sub>-51.1%</sub>  | 4.1      | 1.2      |
| ATIS              | 8.3      | 6.9         | 2.7            | 3.4   | <b>1.7</b> <sub>-79.5%</sub> | 1.9 <sub>-77.1%</sub>         | 5.2      | 1.1      |
| CHiME-4           | 11.1     | 11.0        | 7.9            | 8.2   | 7.0 <sub>-36.9%</sub>        | <b>6.6</b> <sub>-40.5%</sub>  | 9.1      | 2.8      |
| Tedlium-3         | 8.5      | 8.0         | 6.6            | 5.2   | 7.4 <sub>-12.9%</sub>        | <b>4.6</b> <sub>-45.9%</sub>  | 3.0      | 0.7      |
| CV- <i>accent</i> | 14.8     | 16.0        | 12.9           | 15.5  | 11.0 <sub>-25.7%</sub>       | <b>11.0</b> <sub>-25.7%</sub> | 11.4     | 7.9      |
| SwitchBoard       | 15.7     | 15.4        | 15.9           | 18.4  | 14.9 <sub>-5.1%</sub>        | <b>14.1</b> <sub>-10.2%</sub> | 12.6     | 4.2      |
| LRS2              | 10.1     | 9.6         | 9.5            | 10.2  | <b>6.6</b> <sub>-34.7%</sub> | 8.8 <sub>-12.9%</sub>         | 6.9      | 2.6      |
| CORAAL            | 21.4     | 21.4        | 23.1           | 22.9  | 20.9 <sub>-2.3%</sub>        | <b>19.2</b> <sub>-10.3%</sub> | 21.8     | 10.7     |

and  $x^{(i)}$  is the  $i$ -th hypothesis in N-best list. This item aims to encourage the correction model to preferentially consider tokens into the N-best hypotheses list, preventing arbitrary modification in huge decoding space.  $\alpha_i$  is a hyper-parameter for  $i$ -th hypothesis that decreases with the order ranked by the acoustic model.

**H2T-LoRA** avoids tuning the whole set of parameters of a pre-trained model by inserting a neural module with a small number of extra trainable parameters to approximate the full parameter updates, allowing for efficient learning of the H2T mapping without affecting the pre-trained parameters of the LLM. H2T-LoRA introduces trainable low-rank decomposition matrices into LLMs' existing layers, enabling the model to adapt to new data while keeping the original LLMs fixed to retain the previous knowledge. Specifically, LoRA performs a reparameterization of each model layer expressed as a matrix multiplication by injecting low-rank decomposition matrices (Fig.3 (b)). As a result, the representations generated by the LLM are not distorted due to task-specific tuning, while the adapter module acquires the capability to predict the true transcription from the N-best hypotheses.

Benefiting from efficient training, we can employ a large-scale language model in the H2T-LoRA method, which is expected to understand the task description and capture correlation in the N-best list. Meanwhile, instead of adding an extra training objective in H2T-*ft*, we constrain the decoding space of H2T-LoRA by adding requirement in task description.

## 5 Experimental Results

### 5.1 Language Models Configurations

**T5** (0.75B~3B): T5 family [74] is a set of encoder-decoder models pre-trained on a multi-task mixture of unsupervised and supervised tasks and for which each task is converted into a text-to-text format. T5 works well on a variety of tasks out-of-the-box by prepending a different prefix to the input corresponding to each task, e.g., for machine translation or text summarization. In this paper, we select T5-*large* (0.75B) as the correction model in H2T-*ft* method.

**LLaMA** (7B~65B): Proposed by Meta AI, LLaMA [86] is a collection of foundation language models ranging from 7B, 13B, 30B, and 65B parameters. It is trained on publicly available datasets exclusively, and shows remarkable efficiency on NLP benchmarks. We select LLaMA-13B for LoRA adaptation in H2T-LoRA method as one best setup under ablations.

**GPT-3.5** (175B): Proposed by OpenAI, GPT-3.5-turbo is one of the most advanced large language models, which powers the popular ChatGPT. It has been optimized from the GPT-3 [5] for chat purposes but works well for traditional completions tasks as well. We utilize GPT-3.5-turbo in self-activated in-context learning, which conduct *zero-shot* and *few-shot* learning experiments with designed task prompt.

### 5.2 Training and Evaluation

For *few-shot* settings, the specific task prompts with LLM's response of self-activated ICL are attached in Appendix. For *finetuning* setting, the detailed configuration of H2T-*ft* and H2T-LoRA are also

Table 3: Cross-domain WER results by ICL in *zero-shot* and *few-shot* learning settings. " $o_{nb}$ " and " $o_{cp}$ " respectively denote n-best oracle and compositional oracle that are defined in 5.2.

| Domain Shift      | Test Set           | Baseline | $n$ -shot In-context Learning, $n =$ |                        |                        |                        | Oracle   |          |
|-------------------|--------------------|----------|--------------------------------------|------------------------|------------------------|------------------------|----------|----------|
|                   |                    |          | 0                                    | 1                      | 5                      | 10                     | $o_{nb}$ | $o_{cp}$ |
| Specific Scenario | WSJ- <i>dev93</i>  | 9.0      | 8.5 <sub>-5.6%</sub>                 | 7.8 <sub>-13.3%</sub>  | 7.7 <sub>-14.4%</sub>  | 7.1 <sub>-21.1%</sub>  | 6.5      | 5.3      |
|                   | WSJ- <i>eval92</i> | 7.6      | 7.3 <sub>-3.9%</sub>                 | 6.6 <sub>-13.2%</sub>  | 6.6 <sub>-13.2%</sub>  | 6.3 <sub>-17.1%</sub>  | 5.5      | 4.7      |
|                   | ATIS               | 5.8      | 5.5 <sub>-5.2%</sub>                 | 5.1 <sub>-12.1%</sub>  | 5.0 <sub>-13.8%</sub>  | 4.7 <sub>-19.0%</sub>  | 3.5      | 2.4      |
| Common Noise      | CHiME4- <i>bus</i> | 18.8     | 17.6 <sub>-6.4%</sub>                | 16.7 <sub>-11.2%</sub> | 16.2 <sub>-13.8%</sub> | 15.9 <sub>-20.7%</sub> | 16.8     | 10.7     |
|                   | CHiME4- <i>caf</i> | 16.1     | 14.7 <sub>-8.7%</sub>                | 14.3 <sub>-11.1%</sub> | 13.7 <sub>-14.9%</sub> | 13.2 <sub>-18.0%</sub> | 13.3     | 9.1      |
|                   | CHiME4- <i>ped</i> | 11.5     | 10.9 <sub>-5.2%</sub>                | 9.9 <sub>-14.4%</sub>  | 9.7 <sub>-15.7%</sub>  | 9.4 <sub>-18.3%</sub>  | 8.5      | 5.5      |
|                   | CHiME4- <i>str</i> | 11.4     | 10.9 <sub>-4.4%</sub>                | 10.0 <sub>-12.3%</sub> | 9.7 <sub>-14.9%</sub>  | 9.2 <sub>-19.3%</sub>  | 9.0      | 6.0      |
| Speaker Accent    | CV- <i>af</i>      | 25.3     | 24.9 <sub>-1.6%</sub>                | 24.2 <sub>-4.3%</sub>  | 23.6 <sub>-6.7%</sub>  | 22.6 <sub>-10.7%</sub> | 23.6     | 21.7     |
|                   | CV- <i>au</i>      | 25.8     | 25.1 <sub>-2.7%</sub>                | 24.1 <sub>-6.6%</sub>  | 24.0 <sub>-7.0%</sub>  | 23.3 <sub>-9.7%</sub>  | 24.9     | 21.8     |
|                   | CV- <i>in</i>      | 28.6     | 27.6 <sub>-3.5%</sub>                | 25.6 <sub>-10.5%</sub> | 25.0 <sub>-12.6%</sub> | 24.4 <sub>-14.7%</sub> | 27.1     | 22.6     |
|                   | CV- <i>sg</i>      | 26.4     | 26.5 <sub>+0.4%</sub>                | 25.0 <sub>-5.3%</sub>  | 25.1 <sub>-4.9%</sub>  | 23.7 <sub>-10.2%</sub> | 25.5     | 22.2     |

Table 4: Case study of ICL. The utterance is drawn from WSJ-*dev93* dataset.

| Type                        | Utterance                                                                                                                   | WER  |
|-----------------------------|-----------------------------------------------------------------------------------------------------------------------------|------|
| 1 <sup>st</sup> Hypo. by AM | Bankers in Hong Kong expect <b>xinnepec</b> to return for more loans as it develops China’s <b>petro chemical</b> industry. | 16.7 |
| 2 <sup>nd</sup> Hypo. by AM | Bankers in Hong Kong expect <b>xinepec</b> to return for more loans as it develops China’s <b>petrochemical</b> industry.   | 8.3  |
| Correction by LLM           | Bankers in Hong Kong expect <b>Sinopec</b> to return for more loans as it develops China’s <b>petrochemical</b> industry.   | 0    |
| Ground-truth Transcription  | Bankers in Hong Kong expect <b>Sinopec</b> to return for more loans as it develops China’s <b>petrochemical</b> industry.   | -    |

explained in Appendix. Furthermore, we release some of the pre-trained correction models to allow interested readers to reproduce our results.

We report WER results as the evaluation metric for all methods. Additionally, we report the two oracle WER for comparison, which are 1) the n-best oracle  $o_{nb}$ : WER of the “best candidate” in N-best hypotheses list, and 2) the compositional oracle method  $o_{cp}$ : achievable WER using “all tokens” in N-best hypotheses list. The  $o_{nb}$  can be viewed as upper bound performance of the re-rank based method, while  $o_{cp}$  denotes the upper bound of correction using occurred elements in the list.

### 5.3 Results of H2T-*ft* and H2T-*LoRA*

We first report the WER results for H2T-*ft* and H2T-*LoRA* in the *finetuning* setting, where the training set of HP is available to learn H2T mapping. Whisper is employed as acoustic model for hypotheses generation, and a vanilla language model  $LM_{rank}$  is trained using in-domain transcription of the training set, and then it re-ranks the hypotheses according to perplexity. From Table 2, we observe that 1) correction techniques achieve significant performance gain in specific scenarios, where H2T-*LoRA* respectively reduces 77.1% and 55.1% relative WER on ATIS and WSJ. 2) WER performances on CHiME-4 and CV-*accent* demonstrate proposed correction methods improves the robustness of on background noise and speaker accent. Additionally, H2T-*LoRA* on these two datasets both surpass the upper-bound of re-ranking based method referring to  $o_{nb}$ . 3) In general, H2T-*LoRA* usually generate better WER results than H2T-*ft*, as the low-rank adapter allows LLMs to keep pre-trained knowledge and avoid over-fitting problem.

**Limitation and Failure Studies.** We notice that an over-fitting phenomenon existing in our correction techniques, especially in H2T-*ft* where all parameters are tunable. Furthermore, the mean and variance of the utterance length can potentially influence the WER result, since H2T-*ft* results on CORAAL (long-form speech) and SwitchBoard (large variance in length) both fail to enhance ASR performance. On LibriSpeech, when the WER is low (1.8% by WavLM), there is less room to correct recognition



errors with proposed framework. The experimental results and list the representative failure cases can be found in Appendix Table 6 and Table 7. Given the evidence of ample room for further performance improvement, our proposal thus serves as an appropriate benchmark to assess the contribution of current and future LLMs to ASR.

#### 5.4 In-context Learning Results

We conduct in-context learning experiments in the practical scenario when a well-trained ASR system encounters domain mismatch. To this end, the WavLM is selected as the in-domain acoustic model, and GPT-3.5 serves as the LLM for correction. We mainly consider common domain shifts of application: specific scenario, common background noise, and speaker accent, where 5-best hypotheses are selected as context input. From Table 3, we can observe that: (1) Without any in-domain data, LLM can benefit from ASR results based on the hypotheses list. This performance gain mainly relies on the linguistic knowledge of LLM and self-activated task description in pipeline. (2) A few in-domain pairs effectively enhance the performance gain in terms of WER. From the final output of the reasoning process, we find that LLM attempts to summarize the regulation from the demonstration and then apply it to the given test example. (3) Leveraging the vast knowledge base, LLM can even correct missing tokens that are exclusive from hypotheses list in terms of context information.

To illustrate the third observation, we conduct the case study on *WSJ-dev93* in Table 4. According to the ground-truth transcription, two errors (shown as red) are included in 1<sup>st</sup> hypothesis, where "petro chemical" is wrongly recognized as two tokens perhaps due to the speaking style of the speaker. LLM correct this error since "petrochemical" can be found in 2<sup>nd</sup> hypothesis. However, "Sinopec" is unseen during ASR training, leading it to be recognized as weird tokens ("xinnepec" or "xinepec") in hypotheses. In this case, LLM shows human-like correction – it successfully infers the correct token based on the pronunciation of "xinnepec", as well as the context of "China's petrochemical". In fact, Sinopec is a petrochemical-related Chinese company.

#### 5.5 Additional Discussion

**Effect on Spoken Language Intent Detection.** We examine the effect of error correction on a downstream task of spoken intent detection [81] (SID). To this end, we reproduce an BERT-based SID model [12] and respectively feed the 1-best utterance and corrected utterance by H2T-LoRA for comparison. The ablation results on ATIS dataset are reported in Appendix, which shows that our correction technique can also benefit to SID task in terms of detection accuracy.

**Zero-shot Prompting Results.** We finally report an initial prompting evaluation on CHiME-4 in *zero-shot* setting. Considering the task difficulty, T5 and LLaMA are employed for hypothesis correction. For comparison, we also provide the correction results using a far smaller GPT-2 (1.5B) with a 5-gram LM baseline trained by in-domain transcription.

**Future work.** We find that LLMs potentially perceive acoustic information during pre-training, as they tend to perform error correction using tokens with similar pronunciation. Therefore, our first future work is including more acoustic information in HP dataset, such as token-level confidence provided by ASR engine. Furthermore, considering different data amount of each domain, more parameter-efficient training methods besides low-rank adaptation should be discussed for LLMs tuning [55], e.g., reprogramming [102, 30].

## 6 Conclusion

To explore the benefits in speech-language co-learning, this work introduces a new ASR benchmark that utilizes LLMs for transcription prediction from N-best hypotheses. Our benchmark contains a new HP dataset consisting of more than 316K hypotheses-transcription pairs that are collected from 9 different public ASR corpora. In *few-shot* settings, we demonstrate that LLMs with in-context learning can serve as a plug-and-play back end to effectively alleviate domain shift of ASR. In the *finetuning* setting, our proposed error correction technique based on LLMs achieves better WER performance than the upper-bound of re-ranking based method, which provides a new paradigm for applying ASR in some challenging conditions, such as background noise and speaker accent. We believe our benchmark and findings provide new and unique insights into LLM-enhanced ASR.

## References

- [1] Armen Aghajanyan, Luke Zettlemoyer, and Sonal Gupta. Intrinsic dimensionality explains the effectiveness of language model fine-tuning. *arXiv preprint arXiv:2012.13255*, 2020.
- [2] Alena Aksenova, Daan van Esch, James Flynn, and Pavel Golik. How might we create better benchmarks for speech recognition? In *Proceedings of the 1st Workshop on Benchmarking: Past, Present and Future*, pages 22–34, 2021.
- [3] Rosana Ardila, Megan Branson, Kelly Davis, Michael Henretty, Michael Kohler, Josh Meyer, Reuben Morais, Lindsay Saunders, Francis M Tyers, and Gregor Weber. Common voice: A massively-multilingual speech corpus. *arXiv preprint arXiv:1912.06670*, 2019.
- [4] Ebru Arisoy, Abhinav Sethy, Bhuvana Ramabhadran, and Stanley Chen. Bidirectional recurrent neural network language models for automatic speech recognition. In *2015 IEEE International Conference on Acoustics, Speech and Signal Processing (ICASSP)*, pages 5421–5425. IEEE, 2015.
- [5] Tom Brown, Benjamin Mann, Nick Ryder, Melanie Subbiah, Jared D Kaplan, Prafulla Dhariwal, Arvind Neelakantan, Pranav Shyam, Girish Sastry, Amanda Askell, et al. Language models are few-shot learners. *Advances in neural information processing systems*, 33:1877–1901, 2020.
- [6] Hui Bu, Jiayu Du, Xingyu Na, Bengu Wu, and Hao Zheng. Aishell-1: An open-source mandarin speech corpus and a speech recognition baseline. In *2017 20th conference of the oriental chapter of the international coordinating committee on speech databases and speech I/O systems and assessment (O-COCOSDA)*, pages 1–5. IEEE, 2017.
- [7] Daniela Caballero, Roberto Araya, Hanna Kronholm, Jouni Viiri, André Mansikkaniemi, Sami Lehesvuori, Tuomas Virtanen, and Mikko Kurimo. Asr in classroom today: Automatic visualization of conceptual network in science classrooms. In *Data Driven Approaches in Digital Education: 12th European Conference on Technology Enhanced Learning, EC-TEL 2017, Tallinn, Estonia, September 12–15, 2017, Proceedings 12*, pages 541–544. Springer, 2017.
- [8] Stephanie Chan, Adam Santoro, Andrew Lampinen, Jane Wang, Aaditya Singh, Pierre Richemond, James McClelland, and Felix Hill. Data distributional properties drive emergent in-context learning in transformers. *Advances in Neural Information Processing Systems*, 35:18878–18891, 2022.
- [9] William Chan, Navdeep Jaitly, Quoc Le, and Oriol Vinyals. Listen, attend and spell: A neural network for large vocabulary conversational speech recognition. In *2016 IEEE international conference on acoustics, speech and signal processing (ICASSP)*, pages 4960–4964. IEEE, 2016.
- [10] Chen Chen, Nana Hou, Yuchen Hu, Shashank Shirol, and Eng Siong Chng. Noise-robust speech recognition with 10 minutes unparallelled in-domain data. In *ICASSP 2022-2022 IEEE International Conference on Acoustics, Speech and Signal Processing (ICASSP)*, pages 4298–4302. IEEE, 2022.
- [11] Guoguo Chen, Shuzhou Chai, Guanbo Wang, Jiayu Du, Wei-Qiang Zhang, Chao Weng, Dan Su, Daniel Povey, Jan Trmal, Junbo Zhang, et al. Gigaspeech: An evolving, multi-domain asr corpus with 10,000 hours of transcribed audio. *arXiv preprint arXiv:2106.06909*, 2021.
- [12] Qian Chen, Zhu Zhuo, and Wen Wang. Bert for joint intent classification and slot filling. *arXiv preprint arXiv:1902.10909*, 2019.
- [13] Sanyuan Chen, Chengyi Wang, Zhengyang Chen, Yu Wu, Shujie Liu, Zhuo Chen, Jinyu Li, Naoyuki Kanda, Takuya Yoshioka, Xiong Xiao, et al. Wavlm: Large-scale self-supervised pre-training for full stack speech processing. *IEEE Journal of Selected Topics in Signal Processing*, 16(6):1505–1518, 2022.

- [14] Hyunsoo Cho, Hyuhng Joon Kim, Junyeob Kim, Sang-Woo Lee, Sang-goo Lee, Kang Min Yoo, and Taeuk Kim. Prompt-augmented linear probing: Scaling beyond the limit of few-shot in-context learners. *arXiv preprint arXiv:2212.10873*, 2022.
- [15] Jan Chorowski and Navdeep Jaitly. Towards better decoding and language model integration in sequence to sequence models. *arXiv preprint arXiv:1612.02695*, 2016.
- [16] Grzegorz Chrupała. Putting natural in natural language processing. *arXiv preprint arXiv:2305.04572*, 2023.
- [17] Joon Son Chung, Andrew Senior, Oriol Vinyals, and Andrew Zisserman. Lip reading sentences in the wild. In *2017 IEEE conference on computer vision and pattern recognition (CVPR)*, pages 3444–3453. IEEE, 2017.
- [18] Daniel Dahlmeier and Hwee Tou Ng. Better evaluation for grammatical error correction. In *Proceedings of the 2012 Conference of the North American Chapter of the Association for Computational Linguistics: Human Language Technologies*, pages 568–572, 2012.
- [19] Jacob Devlin, Ming-Wei Chang, Kenton Lee, and Kristina Toutanova. Bert: Pre-training of deep bidirectional transformers for language understanding. *arXiv preprint arXiv:1810.04805*, 2018.
- [20] Linhao Dong, Shuang Xu, and Bo Xu. Speech-transformer: a no-recurrence sequence-to-sequence model for speech recognition. In *2018 IEEE international conference on acoustics, speech and signal processing (ICASSP)*, pages 5884–5888. IEEE, 2018.
- [21] Samrat Dutta, Shreyansh Jain, Ayush Maheshwari, Souvik Pal, Ganesh Ramakrishnan, and Preethi Jyothi. Error correction in asr using sequence-to-sequence models. *arXiv preprint arXiv:2202.01157*, 2022.
- [22] Tao Fang, Jinpeng Hu, Derek F. Wong, Xiang Wan, Lidia S. Chao, and Tsung-Hui Chang. Improving grammatical error correction with multimodal feature integration. In *Findings of the Association for Computational Linguistics: ACL 2023*, pages 9328–9344, Toronto, Canada, July 2023. Association for Computational Linguistics.
- [23] Zhe Gan, Linjie Li, Chunyuan Li, Lijuan Wang, Zicheng Liu, Jianfeng Gao, et al. Vision-language pre-training: Basics, recent advances, and future trends. *Foundations and Trends® in Computer Graphics and Vision*, 14(3–4):163–352, 2022.
- [24] Ankur Gandhe and Ariya Rastrow. Audio-attention discriminative language model for asr rescoring. In *ICASSP 2020-2020 IEEE International Conference on Acoustics, Speech and Signal Processing (ICASSP)*, pages 7944–7948. IEEE, 2020.
- [25] John J Godfrey, Edward C Holliman, and Jane McDaniel. Switchboard: Telephone speech corpus for research and development. In *Acoustics, Speech, and Signal Processing, IEEE International Conference on*, volume 1, pages 517–520. IEEE Computer Society, 1992.
- [26] Alex Graves. Sequence transduction with recurrent neural networks. *arXiv preprint arXiv:1211.3711*, 2012.
- [27] Alex Graves, Santiago Fernández, Faustino Gomez, and Jürgen Schmidhuber. Connectionist temporal classification: labelling unsegmented sequence data with recurrent neural networks. In *Proceedings of the 23rd international conference on Machine learning*, pages 369–376, 2006.
- [28] Terri A Greenslade and J César Félix-Brasdefer. Error correction and learner perceptions in 12 spanish writing. In *Selected Proceedings of the 7th Conference on the Acquisition of Spanish and Portuguese as First and Second Languages*, pages 185–194. Somerville, MA: Cascadilla Proceedings Project, 2006.
- [29] Anmol Gulati, James Qin, Chung-Cheng Chiu, Niki Parmar, Yu Zhang, Jiahui Yu, Wei Han, Shibo Wang, Zhengdong Zhang, Yonghui Wu, et al. Conformer: Convolution-augmented transformer for speech recognition. *Proc. Interspeech 2020*, pages 5036–5040, 2020.

- [30] Karen Hambarzumyan, Hrant Khachatrian, and Jonathan May. Warp: Word-level adversarial reprogramming. *arXiv preprint arXiv:2101.00121*, 2021.
- [31] Hany Hassan, Anthony Aue, Chang Chen, Vishal Chowdhary, Jonathan Clark, Christian Federmann, Xuedong Huang, Marcin Junczys-Dowmunt, William Lewis, Mu Li, et al. Achieving human parity on automatic chinese to english news translation. *arXiv preprint arXiv:1803.05567*, 2018.
- [32] Ruidan He, Linlin Liu, Hai Ye, Qingyu Tan, Bosheng Ding, Liying Cheng, Jia-Wei Low, Lidong Bing, and Luo Si. On the effectiveness of adapter-based tuning for pretrained language model adaptation. *arXiv preprint arXiv:2106.03164*, 2021.
- [33] Charles T Hemphill, John J Godfrey, and George R Doddington. The atis spoken language systems pilot corpus. In *Speech and Natural Language: Proceedings of a Workshop Held at Hidden Valley, Pennsylvania, June 24-27, 1990*, 1990.
- [34] François Hernandez, Vincent Nguyen, Sahar Ghannay, Natalia Tomashenko, and Yannick Esteve. Ted-lium 3: Twice as much data and corpus repartition for experiments on speaker adaptation. In *Speech and Computer: 20th International Conference, SPECOM 2018, Leipzig, Germany, September 18–22, 2018, Proceedings 20*, pages 198–208. Springer, 2018.
- [35] Hans-Günter Hirsch and David Pearce. The aurora experimental framework for the performance evaluation of speech recognition systems under noisy conditions. In *ASR2000-Automatic speech recognition: challenges for the new Millenium ISCA tutorial and research workshop (ITRW)*, 2000.
- [36] Pavel Hlubík, Martin Španěl, Marek Boháč, and Lenka Weingartová. Inserting punctuation to asr output in a real-time production environment. In *Text, Speech, and Dialogue: 23rd International Conference, TSD 2020, Brno, Czech Republic, September 8–11, 2020, Proceedings*, pages 418–425. Springer, 2020.
- [37] Duc Tam Hoang, Shamil Chollampatt, and Hwee Tou Ng. Exploiting n-best hypotheses to improve an smt approach to grammatical error correction. *arXiv preprint arXiv:1606.00210*, 2016.
- [38] Edward J Hu, Yelong Shen, Phillip Wallis, Zeyuan Allen-Zhu, Yuanzhi Li, Shean Wang, Lu Wang, and Weizhu Chen. Lora: Low-rank adaptation of large language models. *arXiv preprint arXiv:2106.09685*, 2021.
- [39] Ke Hu, Bo Li, and Tara N Sainath. Scaling up deliberation for multilingual asr. In *2022 IEEE Spoken Language Technology Workshop (SLT)*, pages 771–776. IEEE, 2023.
- [40] Ke Hu, Ruoming Pang, Tara N Sainath, and Trevor Strohman. Transformer based deliberation for two-pass speech recognition. In *2021 IEEE Spoken Language Technology Workshop (SLT)*, pages 68–74. IEEE, 2021.
- [41] Ke Hu, Tara N Sainath, Ruoming Pang, and Rohit Prabhavalkar. Deliberation model based two-pass end-to-end speech recognition. In *ICASSP 2020-2020 IEEE International Conference on Acoustics, Speech and Signal Processing (ICASSP)*, pages 7799–7803. IEEE, 2020.
- [42] YJSC Hu. Subjective evaluation and comparison of speech enhancement algorithms. *Speech Communication*, 49:588–601, 2007.
- [43] Zhiqiang Hu, Yihuai Lan, Lei Wang, Wanyu Xu, Ee-Peng Lim, Roy Ka-Wei Lee, Lidong Bing, and Soujanya Poria. Llm-adapters: An adapter family for parameter-efficient fine-tuning of large language models. *arXiv preprint arXiv:2304.01933*, 2023.
- [44] Hongzhao Huang and Fuchun Peng. An empirical study of efficient asr rescoring with transformers. *arXiv preprint arXiv:1910.11450*, 2019.
- [45] Yukun Huang, Yanda Chen, Zhou Yu, and Kathleen McKeown. In-context learning distillation: Transferring few-shot learning ability of pre-trained language models. *arXiv preprint arXiv:2212.10670*, 2022.

- [46] Jacob Kahn, Morgane Riviere, Weiyi Zheng, Evgeny Kharitonov, Qiantong Xu, Pierre-Emmanuel Mazaré, Julien Karadayi, Vitaliy Liptchinsky, Ronan Collobert, Christian Fuegen, et al. Libri-light: A benchmark for asr with limited or no supervision. In *ICASSP 2020-2020 IEEE International Conference on Acoustics, Speech and Signal Processing (ICASSP)*, pages 7669–7673. IEEE, 2020.
- [47] Anjuli Kannan, Yonghui Wu, Patrick Nguyen, Tara N Sainath, Zhijeng Chen, and Rohit Prabhavalkar. An analysis of incorporating an external language model into a sequence-to-sequence model. In *2018 IEEE International Conference on Acoustics, Speech and Signal Processing (ICASSP)*, pages 1–5828. IEEE, 2018.
- [48] Tyler Kendall and Charlie Farrington. The corpus of regional african american language. version 2021.07. eugene, or: The online resources for african american language project, 2021.
- [49] Anis Koubaa. Gpt-4 vs. gpt-3.5: A concise showdown. 2023.
- [50] Andrew K Lampinen, Ishita Dasgupta, Stephanie CY Chan, Kory Matthewson, Michael Henry Tessler, Antonia Creswell, James L McClelland, Jane X Wang, and Felix Hill. Can language models learn from explanations in context? *arXiv preprint arXiv:2204.02329*, 2022.
- [51] Siddique Latif, Junaid Qadir, Adnan Qayyum, Muhammad Usama, and Shahzad Younis. Speech technology for healthcare: Opportunities, challenges, and state of the art. *IEEE Reviews in Biomedical Engineering*, 14:342–356, 2020.
- [52] Yichong Leng, Xu Tan, Wenjie Liu, Kaitao Song, Rui Wang, Xiang-Yang Li, Tao Qin, Ed Lin, and Tie-Yan Liu. Softcorrect: Error correction with soft detection for automatic speech recognition. In *Proceedings of the AAAI Conference on Artificial Intelligence*, volume 37, pages 13034–13042, 2023.
- [53] Yichong Leng, Xu Tan, Rui Wang, Linchen Zhu, Jin Xu, Wenjie Liu, Linquan Liu, Tao Qin, Xiang-Yang Li, Edward Lin, et al. Fastcorrect 2: Fast error correction on multiple candidates for automatic speech recognition. *arXiv preprint arXiv:2109.14420*, 2021.
- [54] Yichong Leng, Xu Tan, Linchen Zhu, Jin Xu, Renqian Luo, Linquan Liu, Tao Qin, Xiangyang Li, Edward Lin, and Tie-Yan Liu. Fastcorrect: Fast error correction with edit alignment for automatic speech recognition. *Advances in Neural Information Processing Systems*, 34:21708–21719, 2021.
- [55] Brian Lester, Rami Al-Rfou, and Noah Constant. The power of scale for parameter-efficient prompt tuning. *arXiv preprint arXiv:2104.08691*, 2021.
- [56] Jinyu Li, Li Deng, Yifan Gong, and Reinhold Haeb-Umbach. An overview of noise-robust automatic speech recognition. *IEEE/ACM Transactions on Audio, Speech, and Language Processing*, 22(4):745–777, 2014.
- [57] Mingda Li, Weitong Ruan, Xinyue Liu, Luca Soldaini, Wael Hamza, and Chengwei Su. Improving spoken language understanding by exploiting asr n-best hypotheses. *arXiv preprint arXiv:2001.05284*, 2020.
- [58] Tatiana Likhomanenko, Qiantong Xu, Vineel Pratap, Paden Tomasello, Jacob Kahn, Gilad Avidov, Ronan Collobert, and Gabriel Synnaeve. Rethinking evaluation in asr: Are our models robust enough? *arXiv preprint arXiv:2010.11745*, 2020.
- [59] Hsin-Yi Lin, Huan-Hsin Tseng, Xugang Lu, and Yu Tsao. Unsupervised noise adaptive speech enhancement by discriminator-constrained optimal transport. *Advances in Neural Information Processing Systems*, 34:19935–19946, 2021.
- [60] Zhaojiang Lin, Andrea Madotto, and Pascale Fung. Exploring versatile generative language model via parameter-efficient transfer learning. *arXiv preprint arXiv:2004.03829*, 2020.
- [61] Yinhan Liu, Myle Ott, Naman Goyal, Jingfei Du, Mandar Joshi, Danqi Chen, Omer Levy, Mike Lewis, Luke Zettlemoyer, and Veselin Stoyanov. Roberta: A robustly optimized bert pretraining approach. *arXiv preprint arXiv:1907.11692*, 2019.

- [62] Dau-Cheng Lyu, Tien-Ping Tan, Eng Siong Chng, and Haizhou Li. Seame: a mandarin-english code-switching speech corpus in south-east asia. In *Eleventh Annual Conference of the International Speech Communication Association*, 2010.
- [63] Rao Ma, Mark JF Gales, Kate Knill, and Mengjie Qian. N-best t5: Robust asr error correction using multiple input hypotheses and constrained decoding space. *arXiv preprint arXiv:2303.00456*, 2023.
- [64] Anirudh Mani, Shruti Palaskar, Nimshi Venkat Meripo, Sandeep Konam, and Florian Metze. Asr error correction and domain adaptation using machine translation. In *ICASSP 2020-2020 IEEE International Conference on Acoustics, Speech and Signal Processing (ICASSP)*, pages 6344–6348. IEEE, 2020.
- [65] Tomas Mikolov, Martin Karafiát, Lukas Burget, Jan Cernocký, and Sanjeev Khudanpur. Recurrent neural network based language model. In *Interspeech*, volume 2, pages 1045–1048. Makuhari, 2010.
- [66] Sewon Min, Mike Lewis, Luke Zettlemoyer, and Hannaneh Hajishirzi. Metaicl: Learning to learn in context. *arXiv preprint arXiv:2110.15943*, 2021.
- [67] Sewon Min, Xinxu Lyu, Ari Holtzman, Mikel Artetxe, Mike Lewis, Hannaneh Hajishirzi, and Luke Zettlemoyer. Rethinking the role of demonstrations: What makes in-context learning work? *arXiv preprint arXiv:2202.12837*, 2022.
- [68] Long Ouyang, Jeffrey Wu, Xu Jiang, Diogo Almeida, Carroll Wainwright, Pamela Mishkin, Chong Zhang, Sandhini Agarwal, Katarina Slama, Alex Ray, et al. Training language models to follow instructions with human feedback. *Advances in Neural Information Processing Systems*, 35:27730–27744, 2022.
- [69] Vassil Panayotov, Guoguo Chen, Daniel Povey, and Sanjeev Khudanpur. Librispeech: an asr corpus based on public domain audio books. In *2015 IEEE international conference on acoustics, speech and signal processing (ICASSP)*, pages 5206–5210. IEEE, 2015.
- [70] Douglas B Paul and Janet Baker. The design for the wall street journal-based csr corpus. In *Speech and Natural Language: Proceedings of a Workshop Held at Harriman, New York, February 23-26, 1992*, 1992.
- [71] Fuchun Peng, Scott Roy, Ben Shahshahani, and Françoise Beaufays. Search results based n-best hypothesis rescoring with maximum entropy classification. In *2013 IEEE Workshop on Automatic Speech Recognition and Understanding*, pages 422–427. IEEE, 2013.
- [72] Alec Radford, Jong Wook Kim, Tao Xu, Greg Brockman, Christine McLeavey, and Ilya Sutskever. Robust speech recognition via large-scale weak supervision. *arXiv preprint arXiv:2212.04356*, 2022.
- [73] Alec Radford, Jeffrey Wu, Rewon Child, David Luan, Dario Amodei, Ilya Sutskever, et al. Language models are unsupervised multitask learners. *OpenAI blog*, 1(8):9, 2019.
- [74] Colin Raffel, Noam Shazeer, Adam Roberts, Katherine Lee, Sharan Narang, Michael Matena, Yanqi Zhou, Wei Li, and Peter J Liu. Exploring the limits of transfer learning with a unified text-to-text transformer. *The Journal of Machine Learning Research*, 21(1):5485–5551, 2020.
- [75] Ohad Rubin, Jonathan Herzig, and Jonathan Berant. Learning to retrieve prompts for in-context learning. *arXiv preprint arXiv:2112.08633*, 2021.
- [76] Julian Salazar, Davis Liang, Toan Q Nguyen, and Katrin Kirchhoff. Masked language model scoring. *arXiv preprint arXiv:1910.14659*, 2019.
- [77] Teven Le Scao, Angela Fan, Christopher Akiki, Ellie Pavlick, Suzana Ilić, Daniel Hesslow, Roman Castagné, Alexandra Sasha Luccioni, François Yvon, Matthias Gallé, et al. Bloom: A 176b-parameter open-access multilingual language model. *arXiv preprint arXiv:2211.05100*, 2022.

- [78] Changhao Shan, Chao Weng, Guangsen Wang, Dan Su, Min Luo, Dong Yu, and Lei Xie. Component fusion: Learning replaceable language model component for end-to-end speech recognition system. In *ICASSP 2019-2019 IEEE International Conference on Acoustics, Speech and Signal Processing (ICASSP)*, pages 5361–5635. IEEE, 2019.
- [79] Kai Shen, Yichong Leng, Xu Tan, Siliang Tang, Yuan Zhang, Wenjie Liu, and Edward Lin. Mask the correct tokens: An embarrassingly simple approach for error correction. *arXiv preprint arXiv:2211.13252*, 2022.
- [80] Joonbo Shin, Yoonhyung Lee, and Kyomin Jung. Effective sentence scoring method using bert for speech recognition. In *Asian Conference on Machine Learning*, pages 1081–1093. PMLR, 2019.
- [81] Prashanth Gurunath Shivakumar, Mu Yang, and Panayiotis Georgiou. Spoken language intent detection using confusion2vec. 2019.
- [82] Anuroop Sriram, Heewoo Jun, Sanjeev Satheesh, and Adam Coates. Cold fusion: Training seq2seq models together with language models. *arXiv preprint arXiv:1708.06426*, 2017.
- [83] Piotr Szymanski, Piotr Zelasko, Mikolaj Morzy, Adrian Szymczak, Marzena Zyla-Hoppe, Joanna Banaszczak, Lukasz Augustyniak, Jan Mizgajski, and Yishay Carmiel. Wer we are and wer we think we are. *arXiv preprint arXiv:2010.03432*, 2020.
- [84] Joachim Thiemann, Nobutaka Ito, and Emmanuel Vincent. Demand: a collection of multi-channel recordings of acoustic noise in diverse environments. In *Proc. Meetings Acoust*, pages 1–6, 2013.
- [85] Shubham Toshniwal, Anjuli Kannan, Chung-Cheng Chiu, Yonghui Wu, Tara N Sainath, and Karen Livescu. A comparison of techniques for language model integration in encoder-decoder speech recognition. In *2018 IEEE spoken language technology workshop (SLT)*, pages 369–375. IEEE, 2018.
- [86] Hugo Touvron, Thibaut Lavril, Gautier Izacard, Xavier Martinet, Marie-Anne Lachaux, Timothée Lacroix, Baptiste Rozière, Naman Goyal, Eric Hambro, Faisal Azhar, et al. Llama: Open and efficient foundation language models. *arXiv preprint arXiv:2302.13971*, 2023.
- [87] Mehmet Ali Tuğtekin Turan, Emmanuel Vincent, and Denis Jouvét. Achieving multi-accent asr via unsupervised acoustic model adaptation. In *INTERSPEECH 2020*, 2020.
- [88] Takuma Udagawa, Masayuki Suzuki, Gakuto Kurata, Nobuyasu Itoh, and George Saon. Effect and analysis of large-scale language model rescoring on competitive asr systems. *arXiv preprint arXiv:2204.00212*, 2022.
- [89] Cassia Valentini-Botinhao et al. Noisy speech database for training speech enhancement algorithms and tts models. *University of Edinburgh. School of Informatics. Centre for Speech Technology Research (CSTR)*, 2017.
- [90] Ehsan Variansi, Tongzhou Chen, James Apfel, Bhuvana Ramabhadran, Seungji Lee, and Pedro Moreno. Neural oracle search on n-best hypotheses. In *ICASSP 2020-2020 IEEE International Conference on Acoustics, Speech and Signal Processing (ICASSP)*, pages 7824–7828. IEEE, 2020.
- [91] Ashish Vaswani, Noam Shazeer, Niki Parmar, Jakob Uszkoreit, Llion Jones, Aidan N Gomez, Łukasz Kaiser, and Illia Polosukhin. Attention is all you need. *Advances in neural information processing systems*, 30, 2017.
- [92] Emmanuel Vincent, Shinji Watanabe, Jon Barker, and Ricard Marxer. The 4th chime speech separation and recognition challenge. URL: [http://spandh.dcs.shef.ac.uk/chime\\_challenge/\(last accessed on 1 August, 2018\)](http://spandh.dcs.shef.ac.uk/chime_challenge/(last%20accessed%20on%201%20August,%202018)), 2016.
- [93] Changan Wang, Morgane Riviere, Ann Lee, Anne Wu, Chaitanya Talnikar, Daniel Haziza, Mary Williamson, Juan Pino, and Emmanuel Dupoux. Voxpopuli: A large-scale multilingual speech corpus for representation learning, semi-supervised learning and interpretation. *arXiv preprint arXiv:2101.00390*, 2021.

- [94] Weiran Wang, Ke Hu, and Tara N Sainath. Deliberation of streaming rnn-transducer by non-autoregressive decoding. In *ICASSP 2022-2022 IEEE International Conference on Acoustics, Speech and Signal Processing (ICASSP)*, pages 7452–7456. IEEE, 2022.
- [95] Yidong Wang, Zhuohao Yu, Zhengran Zeng, Linyi Yang, Cunxiang Wang, Hao Chen, Chaoya Jiang, Rui Xie, Jindong Wang, Xing Xie, et al. Pandalm: An automatic evaluation benchmark for llm instruction tuning optimization. *arXiv preprint arXiv:2306.05087*, 2023.
- [96] Yu Wang, Yuelin Wang, Kai Dang, Jie Liu, and Zhuo Liu. A comprehensive survey of grammatical error correction. *ACM Transactions on Intelligent Systems and Technology (TIST)*, 12(5):1–51, 2021.
- [97] Shinji Watanabe, Takaaki Hori, Shigeaki Karita, Tomoki Hayashi, Jiro Nishitoba, Yuya Unno, Nelson Enrique Yalta Soplín, Jahn Heymann, Matthew Wiesner, Nanxin Chen, et al. Espnet: End-to-end speech processing toolkit. *arXiv preprint arXiv:1804.00015*, 2018.
- [98] Jason Wei, Yi Tay, Rishi Bommasani, Colin Raffel, Barret Zoph, Sebastian Borgeaud, Dani Yogatama, Maarten Bosma, Denny Zhou, Donald Metzler, et al. Emergent abilities of large language models. *arXiv preprint arXiv:2206.07682*, 2022.
- [99] Johannes Wirth and Rene Peinl. Automatic speech recognition in german: A detailed error analysis. In *2022 IEEE International Conference on Omni-layer Intelligent Systems (COINS)*, pages 1–8. IEEE, 2022.
- [100] Yingce Xia, Fei Tian, Lijun Wu, Jianxin Lin, Tao Qin, Nenghai Yu, and Tie-Yan Liu. Deliberation networks: Sequence generation beyond one-pass decoding. *Advances in neural information processing systems*, 30, 2017.
- [101] Sang Michael Xie, Aditi Raghunathan, Percy Liang, and Tengyu Ma. An explanation of in-context learning as implicit bayesian inference. *arXiv preprint arXiv:2111.02080*, 2021.
- [102] Chao-Han Huck Yang, Yun-Yun Tsai, and Pin-Yu Chen. Voice2series: Reprogramming acoustic models for time series classification. In *International Conference on Machine Learning*, pages 11808–11819. PMLR, 2021.
- [103] Xi Ye and Greg Durrett. Explanation selection using unlabeled data for in-context learning. *arXiv preprint arXiv:2302.04813*, 2023.
- [104] Albert Zeyer, Kazuki Irie, Ralf Schlüter, and Hermann Ney. Improved training of end-to-end attention models for speech recognition. *arXiv preprint arXiv:1805.03294*, 2018.
- [105] Renrui Zhang, Jiaming Han, Aojun Zhou, Xiangfei Hu, Shilin Yan, Pan Lu, Hongsheng Li, Peng Gao, and Yu Qiao. Llama-adapter: Efficient fine-tuning of language models with zero-init attention. *arXiv preprint arXiv:2303.16199*, 2023.
- [106] Shiliang Zhang, Ming Lei, and Zhijie Yan. Automatic spelling correction with transformer for ctc-based end-to-end speech recognition. *arXiv preprint arXiv:1904.10045*, 2019.
- [107] Susan Zhang, Stephen Roller, Naman Goyal, Mikel Artetxe, Moya Chen, Shuohui Chen, Christopher Dewan, Mona Diab, Xian Li, Xi Victoria Lin, et al. Opt: Open pre-trained transformer language models. *arXiv preprint arXiv:2205.01068*, 2022.
- [108] Yuanhan Zhang, Kaiyang Zhou, and Ziwei Liu. What makes good examples for visual in-context learning? *arXiv preprint arXiv:2301.13670*, 2023.
- [109] Yun Zhao, Xuerui Yang, Jinchao Wang, Yongyu Gao, Chao Yan, and Yuanfu Zhou. Bart based semantic correction for mandarin automatic speech recognition system. *arXiv preprint arXiv:2104.05507*, 2021.



## Checklist

The checklist follows the references. Please read the checklist guidelines carefully for information on how to answer these questions. For each question, change the default **[TODO]** to **[Yes]**, **[No]**, or **[N/A]**. You are strongly encouraged to include a **justification to your answer**, either by referencing the appropriate section of your paper or providing a brief inline description. For example:

- Did you include the license to the code and datasets? **[Yes]**

Please do not modify the questions and only use the provided macros for your answers. Note that the Checklist section does not count towards the page limit. In your paper, please delete this instructions block and only keep the Checklist section heading above along with the questions/answers below.

1. For all authors...
  - (a) Do the main claims made in the abstract and introduction accurately reflect the paper's contributions and scope? **[Yes]**
  - (b) Did you describe the limitations of your work? **[Yes]** **See Section 5.3**
  - (c) Did you discuss any potential negative societal impacts of your work? **[N/A]**
  - (d) Have you read the ethics review guidelines and ensured that your paper conforms to them? **[Yes]**
2. If you are including theoretical results...
  - (a) Did you state the full set of assumptions of all theoretical results? **[N/A]**
  - (b) Did you include complete proofs of all theoretical results? **[N/A]**
3. If you ran experiments (e.g. for benchmarks)...
  - (a) Did you include the code, data, and instructions needed to reproduce the main experimental results (either in the supplemental material or as a URL)? **[Yes]** **See Section 3.**
  - (b) Did you specify all the training details (e.g., data splits, hyperparameters, how they were chosen)? **[Yes]** **See Section 5.1.**
  - (c) Did you report error bars (e.g., with respect to the random seed after running experiments multiple times)? **[N/A]**
  - (d) Did you include the total amount of compute and the type of resources used (e.g., type of GPUs, internal cluster, or cloud provider)? **[Yes]**
4. If you are using existing assets (e.g., code, data, models) or curating/releasing new assets...
  - (a) If your work uses existing assets, did you cite the creators? **[Yes]** **See Appendix.**
  - (b) Did you mention the license of the assets? **[Yes]** **See Appendix.**
  - (c) Did you include any new assets either in the supplemental material or as a URL? **[Yes]**
  - (d) Did you discuss whether and how consent was obtained from people whose data you're using/curating? **[N/A]**
  - (e) Did you discuss whether the data you are using/curating contains personally identifiable information or offensive content? **[N/A]**
5. If you used crowdsourcing or conducted research with human subjects...
  - (a) Did you include the full text of instructions given to participants and screenshots, if applicable? **[N/A]**
  - (b) Did you describe any potential participant risks, with links to Institutional Review Board (IRB) approvals, if applicable? **[N/A]**
  - (c) Did you include the estimated hourly wage paid to participants and the total amount spent on participant compensation? **[N/A]**

## Appendix

### Have LLMs seen ASR transcription during pre-training?

We raise a concern about LLM correction: is the remarkable correction result owing to the fact that the ASR transcriptions exist in the pre-trained corpus of LLM?

To evaluate this concern for GPT-3.5, we manually create some hypotheses to simulate the utterance in case study in Table 4, and we show the correction results in Table 5.

Table 5: Synthetic hypotheses for LLM correction

| ID | Utterance                                                                                                                                        |
|----|--------------------------------------------------------------------------------------------------------------------------------------------------|
| 1  | Patrue China and xinnepec own all national oil pipeline infrastructure.<br>Corrected item: "Patrue China" → "PetroChina", "xinnepec" → "Sinopec" |
| 2  | The Legend of Saida series is one of iconic games of nine ten door company.<br>Corrected item: "Saida" → "Zelda", "nine ten door" → "Nintendo"   |

We observe that given arbitrarily fabricated utterances, LLM can still give reasonable correction results, especially on specific terms. Furthermore, we attach the LLM reasoning process for two examples, which shows the utilization of context information:

*ID 1: Please note that the transcription assumes "Patrue China" was an error, and "PetroChina" was intended instead. Additionally, "xinnepec" has been interpreted as "Sinopec," which is another major Chinese oil and gas company.*

*ID 2: Please note that there may have been some confusion with the phrase "nine ten door company," as it doesn't match any known company or widely recognized term. As a result, I have inferred that it may have been a misinterpretation or a typographical error. The transcription assumes "Zelda" as a possible replacement for "Saida" based on its similarity to the well-known game series "The Legend of Zelda" developed by Nintendo.*

In H2T-ft, the T5 model was pre-trained on C4 dataset that does not include WSJ, but it still achieves significant WER reduction on WSJ. In H2T-LoRA, we do not find the any ASR transcript exists in the pre-trained data of LLaMa according to their papers or public information.

In general, we argue that the improved results of LLMs correction primarily stem from its extensive knowledge base and the ability to utilize context information as part of a *formal scientific experimental process*. However, the methods through which indirect knowledge is captured and propagated across a large area remain open questions for future investigation. We hope that by initiating this study, the results would encourage more further and ongoing works on knowledge grounding in the future.

### Resources for Hypotheses Paradise (HP) Generation

The related toolkit and pre-trained models used to generate HP dataset are listed as follows:

- For ASR model, we used pre-trained WavLM from HuggingFace<sup>4</sup> and the ESPNet toolkit<sup>5</sup>.
- When using WavLM for ASR decoding, we also incorporate an external LM rescoring option, which is trained using extra text data from web<sup>6</sup>.
- Apart from WavLM, we also select Whisper-LargeV2<sup>7</sup> for ASR decoding.

### Self-activated Prompting for Error Correction

We illustrate the given prompt for self-activated learning, as well as the response form LLM for each turn as follows:

<sup>4</sup>[https://huggingface.co/espnet/simpleoier\\_librispeech\\_asr\\_train\\_asr\\_conformer7\\_wavlm\\_large\\_raw\\_en\\_bpe5000\\_sp](https://huggingface.co/espnet/simpleoier_librispeech_asr_train_asr_conformer7_wavlm_large_raw_en_bpe5000_sp)

<sup>5</sup><https://github.com/espnet/espnet/tree/master/egs2/librispeech/asr1>

<sup>6</sup><http://www.openslr.org/resources/11/librispeech-lm-norm.txt.gz>

<sup>7</sup><https://github.com/openai/whisper>

**Q:** Are you familiar with speech recognition?

**R:** Yes, I am familiar with speech recognition. Speech recognition, also known as automatic speech recognition (ASR) or speech-to-text, is the process of converting spoken language into text. This technology involves using algorithms and machine learning models to analyze and transcribe the acoustic features of spoken words and phrases. Speech recognition has many applications, including voice-controlled assistants, automated phone systems, and transcription services.

**Q:** Are you familiar with language model rescoring in ASR?

**R:** Yes, I am familiar with language model rescoring for speech recognition. Language model rescoring is a technique used to improve the accuracy of speech recognition systems. It involves using a separate language model to evaluate the likelihood of a given hypothesis list. This separate model is typically more complex and powerful than the initial language model used for the transcription, and it is used to re-score the transcription based on the probability of the words occurring in the given context. The rescoring process involves taking the output of the initial language model, which is usually based on statistical methods such as Hidden Markov Models, and then applying a more advanced language model, such as a neural network-based language model, to generate a more accurate transcription. This is accomplished by re-ranking the possible transcriptions based on the probabilities assigned by the more advanced language model. Language model rescoring has been shown to significantly improve the accuracy of speech recognition systems, particularly in noisy or challenging environments where the initial language model may not perform well.

**Q:** Can you give a possible example on language model rescoring with 5-best hypotheses?

**R:** Sure, here is an example of language model rescoring for ASR with 5-best hypotheses:

1. I want to go to the store.
2. I want to go to the storm.
3. I want to go to the stove.
4. I want to go to the star.
5. I want to go to the storage.

After rescoring, I think the ground-truth of this speech should be: I want to go to the store.

**Q:** Nice job, I will give you a real example as a demonstration from [target domain]. The 5-best hypothesis is: [hypotheses list from training set], and I expect your output is: [corresponding transcription]. Following this example, can you report the true transcription from the following 5-best hypotheses: [hypotheses list for inference]

It is noted that the responses from GPT-3.5 vary from random seeds. In our experiments, we utilize the API key from OpenAI, and fix the above template before the last turn error correction.

We observe that many recent works [103] of ICL focus on the selection strategy for in-domain demonstration, which might have an obvious impact on inference results. We leave the demonstration selection as future work, and in our *few-shot* learning, we manually select those utterances with long lengths according to [67].

## Hypotheses-to-Transcription (H2T) Training Configuration

**H2T-ft.** We employ the T5-v1.1-large pre-trained model (0.75B) downloaded from HuggingFace <sup>8</sup>. Compared with the original T5 model, GELU Sevrus as activation function in the feed-forward layer to replace ReLU. Furthermore, T5 Version 1.1 was only pre-trained on C4 excluding any supervised training. Therefore, this model has to be fine-tuned before it is applied on a downstream task.

We finetune 20 epochs on each domain of HP dataset with a batch size of 16. To select the best model, we first split a validation set with 5% data amount of training set. The learning rate varies from  $1 \times e^{-4} \sim 1 \times e^{-3}$  according to data amount of each domain, and AdamW is employed for optimization. The  $\alpha_1$  to  $\alpha_4$  are set as 0.1, 0.05, 0.05, 0.05 respectively, as the 2<sup>nd</sup> utterances are usually more informative than others as shown in Fig.1. In practice, we observe the over-fitting phenomenon during training. The WER on training set can be lower than 1%, however, the

<sup>8</sup>[https://huggingface.co/google/t5-v1\\_1-large](https://huggingface.co/google/t5-v1_1-large)

performance on CORAAL dataset even is even worse than the baseline. In other words, H2T-*ft* still has room for improvement by adding some techniques for avoiding over-fitting.

**H2T-LoRA.** We select LLaMa-13B as the frozen pre-trained model in our method, which is downloaded from HuggingFace<sup>9</sup>. The learning rate is set as  $1e^{-4}$ , and the batch size is 128. For the low-rank adapter, we implement by peft<sup>10</sup>, where the configuration of *lora\_r* is set as 8. Similarly, we also use T5-v1.1-large as pre-trained model with low-rank adapter for experiments, where the learning rate is set as  $3e^{-4}$  and the *lora\_r* is set as 16.

We train 10 epochs using AdamW optimizer, and the prompt for LLM is designed as follows:

*"Below is a best-hypotheses that is transcribed from an automatic speech recognition system. Write a response to predict the true transcription using the tokens from other-hypotheses.### best-hypothesis:{1<sup>st</sup> utterance}### other-hypothesis:{2<sup>nd</sup> ~ 5<sup>th</sup> utterances}###Response:"*

The prompt template is not unique, and it leaves a slight impact on the final WER result. Additionally, we calculate the WER using Sclite<sup>11</sup> toolkit, which keep consistent with evaluation script of ESPNet<sup>12</sup>.

*LM<sub>rank</sub>* is an Transformer-based language model that is implemented using ESPNet toolkit<sup>13</sup>, where the training transcription from each HP domain is utilized for a typical LM training. The Transformer layer of each model varies from 8 to 16 in terms of data amount. The training epoch is set as 20, and Adam is employed as optimizer. The initial learning rate is set as 0.002 with warm up strategy. During decoding, the perplexity of each hypothesis is calculated for re-ranking the N-best list, and the utterance with the lowest perplexity is selected as the final output.

### LibriSpeech Results and Failure Cases Study

Table 6: WER (%) results on LibriSpeech dataset. "*o<sub>nb</sub>*" and "*o<sub>cp</sub>*" respectively denote n-best oracle and compositional oracle that are defined in 5.2.

| Test Set         | Baseline | LM <sub>rank</sub> | Correction with      |                             | Oracle                |                       |
|------------------|----------|--------------------|----------------------|-----------------------------|-----------------------|-----------------------|
|                  |          |                    | H2T- <i>ft</i>       | H2T- <i>LoRA</i>            | <i>o<sub>nb</sub></i> | <i>o<sub>cp</sub></i> |
| LS- <i>clean</i> | 1.8      | 1.8                | 1.8 <sub>-0.0%</sub> | <b>1.7</b> <sub>-5.6%</sub> | 1.0                   | 0.6                   |
| LS- <i>other</i> | 3.7      | 3.7                | 3.9 <sub>+5.4%</sub> | 3.8 <sub>+2.7%</sub>        | 2.7                   | 1.6                   |

We list two representative failure cases from LibriSpeech-*test-other* in Table. 7. For the first case, "ward" is corrected by "warde" as there is an "his" behind it. Additionally, we observe that "warde" also appears in the 2<sup>nd</sup> hypothesis, so LLM adopts it according to context information. For the second case, LLM directly adopts the 2<sup>nd</sup> utterance in the N-best list, as "think" does not often appear at the beginning of a sentence from a grammatical perspective. Therefore, as explained in future work of 5.5, we argue that LLM correction should also consider acoustic information provided by the ASR system, which helps to avoid "over-correction" cases and keeps the fidelity to spoken language.

### Results on Spoken Language Intent Detection (SID) task

We first train an intent detection model using the transcription of ATIS training set, as the intent label is available for each example. Then, during testing, we respectively feed the 1<sup>st</sup> ~ 5<sup>th</sup> utterances in Whisper hypotheses list, utterance after correction, and ground-truth transcription as input text for intent detection. The accuracy results are reported in Table 8.

We observe that: (1) When we use corrected text for intent detection, the accuracy is 97.4% which achieves an absolute improvement of 2.5% over 1<sup>st</sup> utterance in the hypothesis list. (2) 2<sup>nd</sup> utterance is more suitable for intent detection than 1<sup>st</sup> utterance in terms of accuracy. This phenomenon validates the case (ii) from a perspective other than WER, where the discarded utterances in the N-best hypotheses might be better than the selected utterance. (3) LLM correction based on N-best

<sup>9</sup><https://huggingface.co/decapoda-research/llama-13b-hf>

<sup>10</sup><https://github.com/huggingface/peft>

<sup>11</sup><https://github.com/usnistgov/SCTK/blob/master/doc/sclite.htm>

<sup>12</sup><https://github.com/espnet/espnet/blob/master/egs2/TEMPLATE/asr1/asr.sh>

<sup>13</sup><https://github.com/espnet/espnet/tree/master/egs2/librispeech/asr1>

Table 7: Failure cases corrected by H2T-LoRA. The utterances are drawn from LibriSpeech-test-*other*.

| Type                        | Utterance                                                                                                | WER  |
|-----------------------------|----------------------------------------------------------------------------------------------------------|------|
| 1 <sup>st</sup> Hypo. by AM | Yet there was gambling again the second night between <u>ward</u> and several others of his profession.  | 0    |
| Correction by H2T           | Yet there was gambling again the second night between <u>warde</u> and several others of his profession. | 6.25 |
| Ground-truth Transcription  | Yet there was gambling again the second night between <b>ward</b> and several others of his profession.  | -    |
| 1 <sup>st</sup> Hypo. by AM | <u>Think</u> he really needs it he pursued                                                               | 0    |
| Correction by H2T           | He really needs it he pursued                                                                            | 14.3 |
| Ground-truth Transcription  | <b>Think</b> he really needs it he pursued                                                               | -    |

Table 8: Accuracy (%) results of intent detection with different input on ATIS test set.

| Textual input | $n^{th}$ utterance in Hypotheses list, $n =$ |      |      |      |      | After Correction             | Oracle |
|---------------|----------------------------------------------|------|------|------|------|------------------------------|--------|
|               | 1                                            | 2    | 3    | 4    | 5    |                              |        |
| Acc. (%)      | 94.9                                         | 95.5 | 94.2 | 94.3 | 94.2 | <b>97.4</b> <sub>+2.5%</sub> | 97.9   |

hypotheses can effectively enhance the downstream SIT result, which achieves comparable accuracy with using ground-truth transcription (97.4% v.s. 97.9%).

### Preliminary Results on Zero-shot Prompting-based Error Correction

To examine the zero-shot ability of LLM, we propose a framework that requires a targeted LLM to perform either (i) ranking-based error correction or (ii) single-sentence generative correction. We follow the self-activated prompting method mentioned in the previous appendix section to repurpose the language model in the form of zero-shot error correction, without providing instructions. We used LLaMA 13B to perform these zero-shot error correction tasks. Using the test set extracted from Whisper, we observed that the zero-shot method did not yield improved results on CHiME-4 ( $11.5 \pm 0.5\%$ ) and CV-accent ( $14.9\% \pm 1.5\%$ ). This zero-shot pipeline performed less stably on the other test set discussed in Table 2, which we consider a failure case with a standard deviation exceeding an absolute value of 10% in terms of WER. For T5-based error correction, we noticed that the method also failed to perform zero-shot error correction by using 0.75B. Using the same decoding test set from WavLM and Whisper, a 5-gram language model (coefficient of 0.1) combined with its acoustic model score showed a 2.95% WER relative improvement. This result is slightly worse than the  $LM_{rank}$  baseline. The current limitations on the results regarding the zero-shot abilities of LMs could be attributable to the model scale. The zero-shot or emergent abilities of these models have been reported to be more significant when the parameter scale of the LLM exceeds 100B.

### Hypotheses Paradise (HP) Dataset Visualizations

We have open-sourced a Colab example<sup>14</sup> for HP dataset visualizations and analysis. First, same as Fig. 1, we visualize and analyze the information in N-best hypotheses from both utterance- and token-levels. Fig. 4 illustrate more visualizations on CHiME-4 test sets, where we can observe valuable information in N-best hypotheses.

Furthermore, we also visualize and compare the word frequency in N-best hypotheses and ground-truth transcription in Fig. 5, where we can observe some but limited gap between them.

<sup>14</sup><https://colab.research.google.com/drive/1traA2scdnmAKFq6yIEZhHwrhCBVxB2ig>

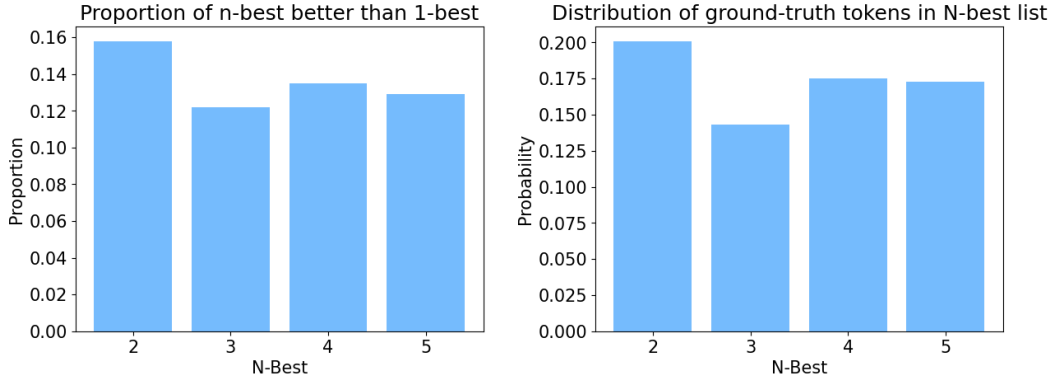

Figure 4: Probabilities of the case (i) and (ii) on CHiME-4 test set, similar to the right part of Fig. 1.

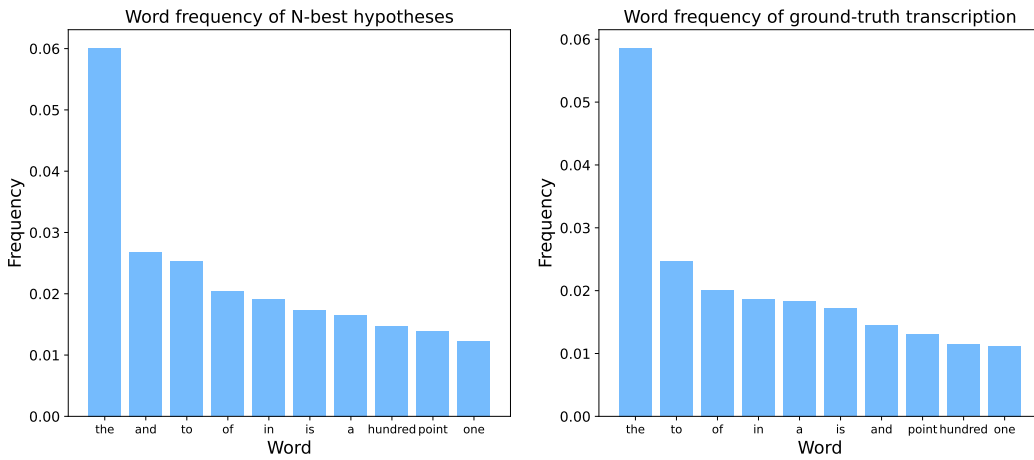

Figure 5: Top-10 word frequencies in N-best hypotheses and ground-truth transcription of CHiME-4 test set.

### N-best Hypotheses Distribution

Fig. 6 visualizes the distribution of N-best hypotheses generated by different-sized Whisper models, *i.e.*, from ‘tiny’ to ‘large’. We can observe very limited diversity in the N-best hypotheses generated by Whisper models. Considering such high monotonicity, we only collect the top-5 hypotheses to form our HP dataset.

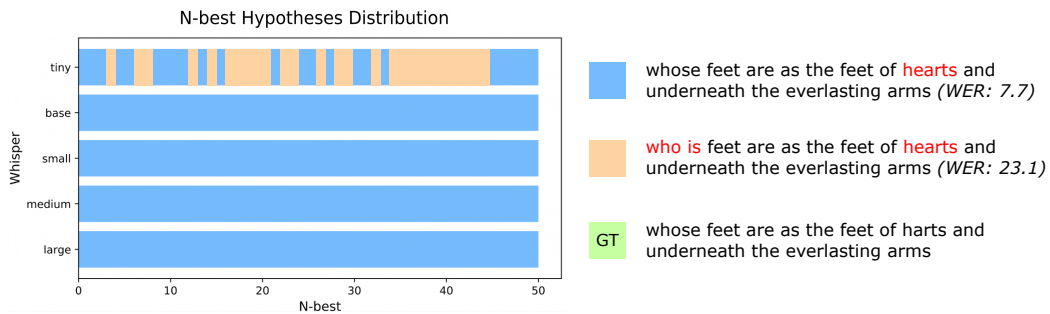

Figure 6: N-best hypotheses distribution with different Whisper models. Each color denotes an unique hypothesis, ‘GT’ denotes the ground-truth transcription. The sample is selected from LibriSpeech test-clean set, *i.e.*, ‘1089/134691/1089-134691-0005.flac’.

## Results on Mandarin Dataset.

We include AISHELL-1 [6] as a Mandarin dataset into HP benchmark, consisting of a training set with 120098 utterances and a testing set with 7176 utterances. We randomly select 20k examples (16.7%) from training set to evaluate the effect of proposed H2T-LoRA. For the foundation model, we employ Chinese LLaMa2-7b from Huggingface<sup>15</sup>, and keep other settings consistent with H2T-LoRA in this paper. Notably, ASR on Mandarin dataset is usually evaluated by character error rate (CER), as character is equal to word in Chinese.

Table 9: CER (%) results on AISHELL-1 dataset using 20k (16.7%) training examples. " $o_{nb}$ " and " $o_{cp}$ " respectively denote n-best oracle and compositional oracle that are defined in 5.2.

| AM      | Baseline | H2T-LoRA              | $o_{nb}$ | $o_{cp}$ |
|---------|----------|-----------------------|----------|----------|
| Whisper | 6.3      | 5.0 <sub>-20.6%</sub> | 4.1      | 3.1      |

## Comparison with Error Correction Baselines

Compared with speech recognition, error correction techniques are more actively explored in the NLP community, as known as Grammatical Error Correction (GEC). However, directly evaluating well-trained GEC on our benchmark is unfair: the "Grammar" might be different between ASR transcription and normal text. To address it, we first train two error correction models (T5-large and FLAN-T5-large) in a typical sequence-to-sequence manner, which consumes the top-1 hypothesis to predict the true transcription. Furthermore, we also reproduce the MM-GEC from [22], where speech signal is utilized to provide grounded information with a cross-attention approach. Specifically, we employ top-1 hypothesis as ungrammatical text and recall speech from original dataset to compose paired data. For comparison, we select WSJ and LRS2 from HP dataset as representatives, since H2T-LoRA respectively achieves significant (51.1%) and moderate (12.9%) improvements in terms of WER. The experimental results are reported in Table 10.

Table 10: Comparison WER result with other GEC methods that are trained with top-1 hypothesis and transcription pairs. " $o_{nb}$ " and " $o_{cp}$ " respectively denote n-best oracle and compositional oracle that are defined in 5.2.

| Dataset | Baseline | T5  | FLAN-T5 | MM-GEC | H2T-LoRA                     | $o_{nb}$ | $o_{cp}$ |
|---------|----------|-----|---------|--------|------------------------------|----------|----------|
| WSJ     | 4.5      | 4.5 | 4.2     | 3.7    | <b>2.2</b> <sub>-51.1%</sub> | 4.1      | 1.2      |
| LRS2    | 10.1     | 9.9 | 9.8     | 10.1   | <b>8.8</b> <sub>-12.9%</sub> | 6.9      | 2.6      |

## Noise-robust ASR Results

Apart from CHiME-4, we add two noise-robust ASR datasets to verify the effectiveness of proposed H2T-LoRA. The first is NOIZEUS dataset [42], which is a test set containing 30 sentences corrupted by eight different real-world noises from Aurora-2 dataset [35] at different SNRs. Here we only select the 5dB SNR version for evaluation. To simulate noisy training data, we add these noises to LibriSpeech [69] *train-100* data at random SNRs of  $\{0, 5, 10, 15, 20\}dB$ . The second is VoiceBank-DEMAND dataset [89], which contains 11572 sentences in training set and 824 sentences in test set. The noisy training set contains 10 noises from DEMAND dataset [84]. To simulate more challenging mismatched train-test conditions, we add three different kind of noises [59] at 0dB to original clean test set. As shown in Table 11, our proposed H2T-LoRA presents significant effectiveness on noise-robust ASR task, with consistent improvement on different noise conditions.

<sup>15</sup><https://huggingface.co/ziqingyang/chinese-llama-2-7b>

Table 11: WER (%) results of noise-robust ASR on NOIZEUS and VoiceBank-DEMAND datasets. " $o_{nb}$ " and " $o_{cp}$ " respectively denote n-best oracle and compositional oracle that are defined in 5.2.

| Test set         | Noise       | Baseline | H2T-LoRA               | Oracle   |          |
|------------------|-------------|----------|------------------------|----------|----------|
|                  |             |          |                        | $o_{nb}$ | $o_{cp}$ |
| NOIZEUS          | airport     | 13.2     | 12.4 <sub>-6.1%</sub>  | 11.8     | 7.9      |
|                  | babble      | 21.4     | 18.4 <sub>-14.0%</sub> | 15.4     | 9.9      |
|                  | car         | 19.9     | 18.0 <sub>-9.5%</sub>  | 11.7     | 7.0      |
|                  | exhibition  | 17.7     | 17.6 <sub>-0.6%</sub>  | 12.3     | 9.9      |
|                  | restaurant  | 15.6     | 12.9 <sub>-17.3%</sub> | 10.8     | 8.3      |
|                  | station     | 19.2     | 15.0 <sub>-21.9%</sub> | 14.0     | 9.9      |
|                  | street      | 21.4     | 20.1 <sub>-6.1%</sub>  | 13.8     | 11.2     |
|                  | train       | 21.9     | 21.3 <sub>-2.7%</sub>  | 13.8     | 11.6     |
| VoiceBank-DEMAND | Helicopter  | 10.3     | 6.8 <sub>-34.0%</sub>  | 5.9      | 4.0      |
|                  | Baby-cry    | 10.6     | 6.5 <sub>-38.7%</sub>  | 5.7      | 3.5      |
|                  | Crowd-party | 26.5     | 20.6 <sub>-22.3%</sub> | 17.8     | 12.2     |

## Code-switching ASR Results

Code-switching speech is defined as speech that more than one language within an utterance. Despite the remarkable success of ASR, code-switching speech recognition (CS-ASR) is still a challenging task due to grammatical structure complexity. We conduct experiment using our proposed H2T-LoRA on SEAME dataset [62], which is a conversational Mandarin-English CS corpus collected in Singapore. The training set includes 100 hours of CS speech from 134 speakers. Additionally, SEAME has two official test sets *SEAME-man* and *SEAME-sge*, each consisting of 10 speakers, which are respectively toward Mandarin and English speech. *Test-man* is biased towards Mandarin speech and *Test-sge* towards English.

Table 12: Mixed Mandarin-CER (%) and English-WER (%) results of CS-ASR on SEAME dataset.

| Test set         | Metric | Baseline | H2T-LoRA               |
|------------------|--------|----------|------------------------|
| <i>SEAME-man</i> | CER    | 16.6     | 12.9 <sub>-22.3%</sub> |
| <i>SEAME-sge</i> | WER    | 23.3     | 19.7 <sub>-15.5%</sub> |

## Limitations

Though the proposed HP benchmark provides a new paradigm of generative error correction for ASR, we analyze and discuss the limitations of this work from the following perspective:

- **Evaluation metric.** As an ASR error correction benchmark, HP employs WER as the primary metric to evaluate the system performance. Nevertheless, prior work [2] has pointed out that WER can be too coarse-grained for describing the performance of ASR models. Furthermore, [83] raise community awareness regarding the problems caused by the optimistic bias toward ASR accuracy. In the future, we aim to provide more annotations for spoken language, e.g., entity spans and dependency structure. Accordingly, a comprehensive evaluation framework can be established to assess the quality and interpretability of output from the LLM-enhanced ASR system.
- **Robustness in reality.** HP benchmark covers mainstream domains where ASR tasks are usually deployed. However, as shown in [58], no single validation or test set from public datasets is sufficient to measure transfer to real-world audio data. Since all test sets of HP benchmark are drawn from existing ASR corpus, despite enhancing the WER performance, we are unable to ascertain the extent to which it can mitigate the gap between well-trained ASR models and real-world application scenarios. Furthermore, considering the discrepancy between spoken language and written language, more efforts are required from both speech



and NLP communities to build a human-like robust ASR system beyond single modality [16].

## Broader Impact

With recent advances in using large-scale neural language models to solve problems once believed to be challenging for machines to learn and understand, we believe it is timely to move to the next milestone: providing publicly accessible n-best hypotheses as transcription resources from LLM decoding. This motivation inspires this work, offering a collection of hypotheses paradise, inspired by in-context learning.

- *Who may benefit from this research:* Researchers working on speech technology and language model based error correction; as well as the users using the related techniques for responsible and reproducible machine learning technology.
- *Who may be put at disadvantage from this research:* When our work revealed that open-source hypotheses can be used to generate malicious recognition, we understood the responsibility of properly explaining the results to the public and providing reproducible evaluations. We have discussed terms of use for reusing these hypotheses with legal and regulatory experts, addressing potential risks and concerns.
- *Whether the task/method leverages biases in the data:* To alleviate possible bias in the data and model, we have made efforts to design reproducible metrics and to evaluate a wide variety of reproducible data sources and training configurations. We have also conducted user studies to highlight potential bias in “terms of use” provided in our Github repo.

## Maintenance Plan

- *Who will be supporting/hosting/maintaining the dataset?* Hypotheses Paradise has been actively maintained by the authors of this paper. We are still actively updating the dataset that focus on specific ASR scenario, which are noise-robust ASR and multi-lingual ASR. In INTERSPEECH 2023, we will have a tutorial to introduce the related Hypotheses Paradise-V2 with some excited experimental results. Furthermore, we also open the link to collect more hypothesis-transcription pairs from public.
- *How can the owner/curator/manager of the dataset be contacted?* To contact the main developers, we encourage users to use our emails: {chen1436, yuchen005}@e.ntu.edu.sg, huckiyang@gatech.edu
- *Is there an erratum?* Users can use GitHub to report issues/bugs, and we would actively improve the codes accordingly. We also have a HuggingFace Model card under a non-profit organization in <https://huggingface.co/datasets/PeacefulData/HP-v0>.
- *Will the dataset be updated?* Yes, we are actively updating Hypotheses Paradise codes and data sources. Users could get information and the newly updated version through our GitHub repository.
- *If the dataset relates to people, are there applicable limits on the retention of the data associated with the instances?* No for the Dataset.
- *Will older versions of the dataset continue to be supported/hosted/maintained?* Yes, we will keep the old version that generated by Whisper. All versions can be found on our GitHub repository
- *If others want to extend/augment/build on/contribute to the dataset, is there a mechanism for them to do so?* We maintain Hypotheses Paradise on GitHub and we encourage all users to share their ideas to extend Hypotheses Paradise to more speech recognition cases. Users can use GitHub to report issues/bugs, and send us emails to discuss solutions.
